# Supplementary material for: High catalytic performance of raspberry-like gold nanoparticles and enhancement of stability by silica coating
Source: Royal Society of Chemistry journal article supplement (doi:10.1039/c5ra00650c), 2015-01-01
Supplement: c5ra00650c1.pdf [file c5ra00650c1.pdf]

Supplementary Information for

**High Catalytic Performance of Raspberry-Like Gold  
Nanoparticles and Enhancement of Stability by Silica Coating**

*Hien Mai Duy, Kiouk Seo, Soon Choi, and Hyojong Yoo\**

Department of Chemistry, Hallym University, Chuncheon, Gangwon-do, 200-702, Republic  
of Korea

\*Corresponding author.

E-mail address: [hyojong@hallym.ac.kr](mailto:hyojong@hallym.ac.kr) (H. Yoo).

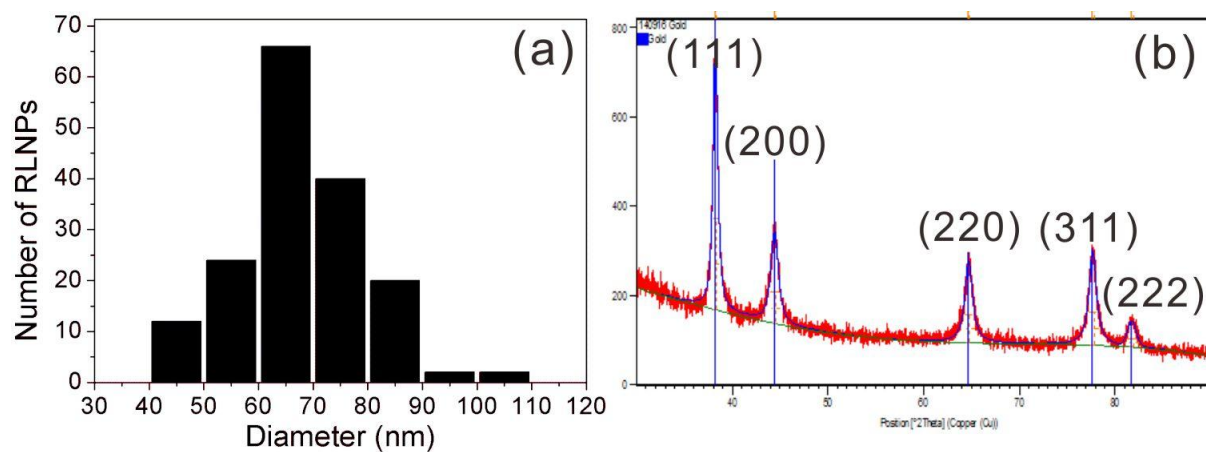

**Figure S1.** (a) Size distribution of Au RLNPs; (b) Powder X-ray diffraction (PXRD) pattern of Au RLNPs (red line) and the pattern of fcc structure of metallic gold (JCPDS card No. 04-0784, blue line)

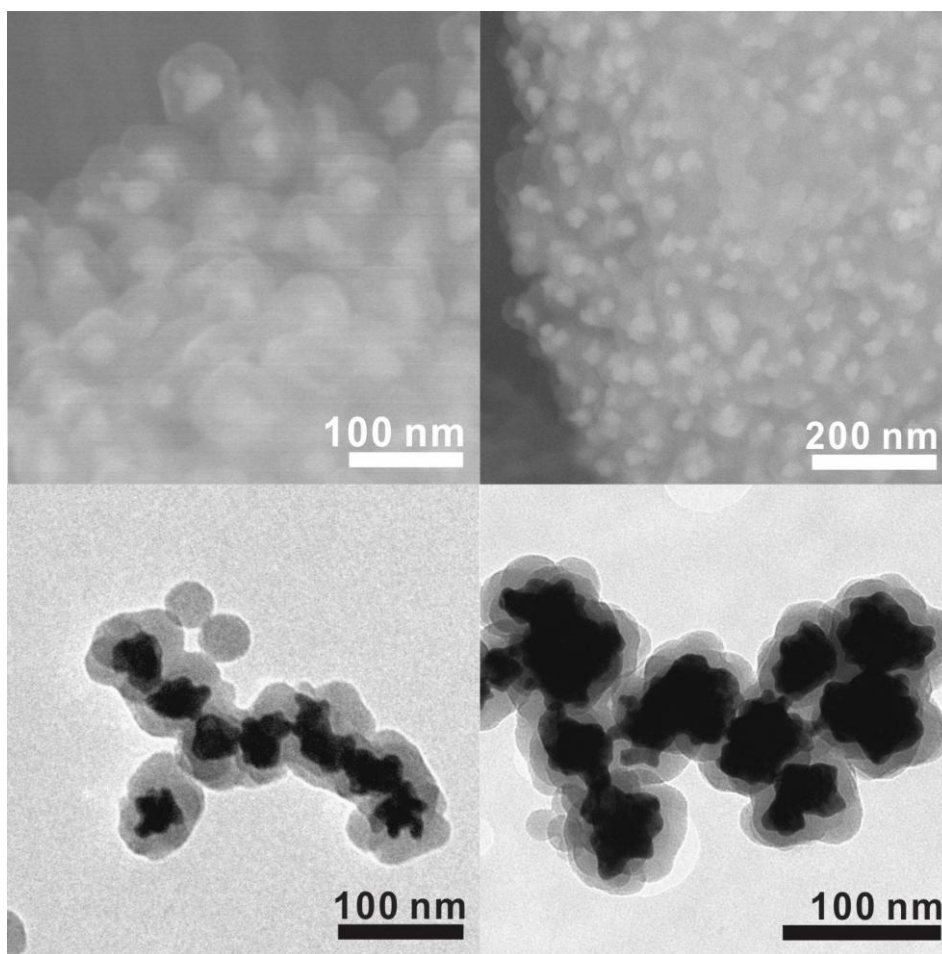

**Figure S2.** SEM (up) and TEM (down) images of Au RLNPs@SiO<sub>2</sub> NPs

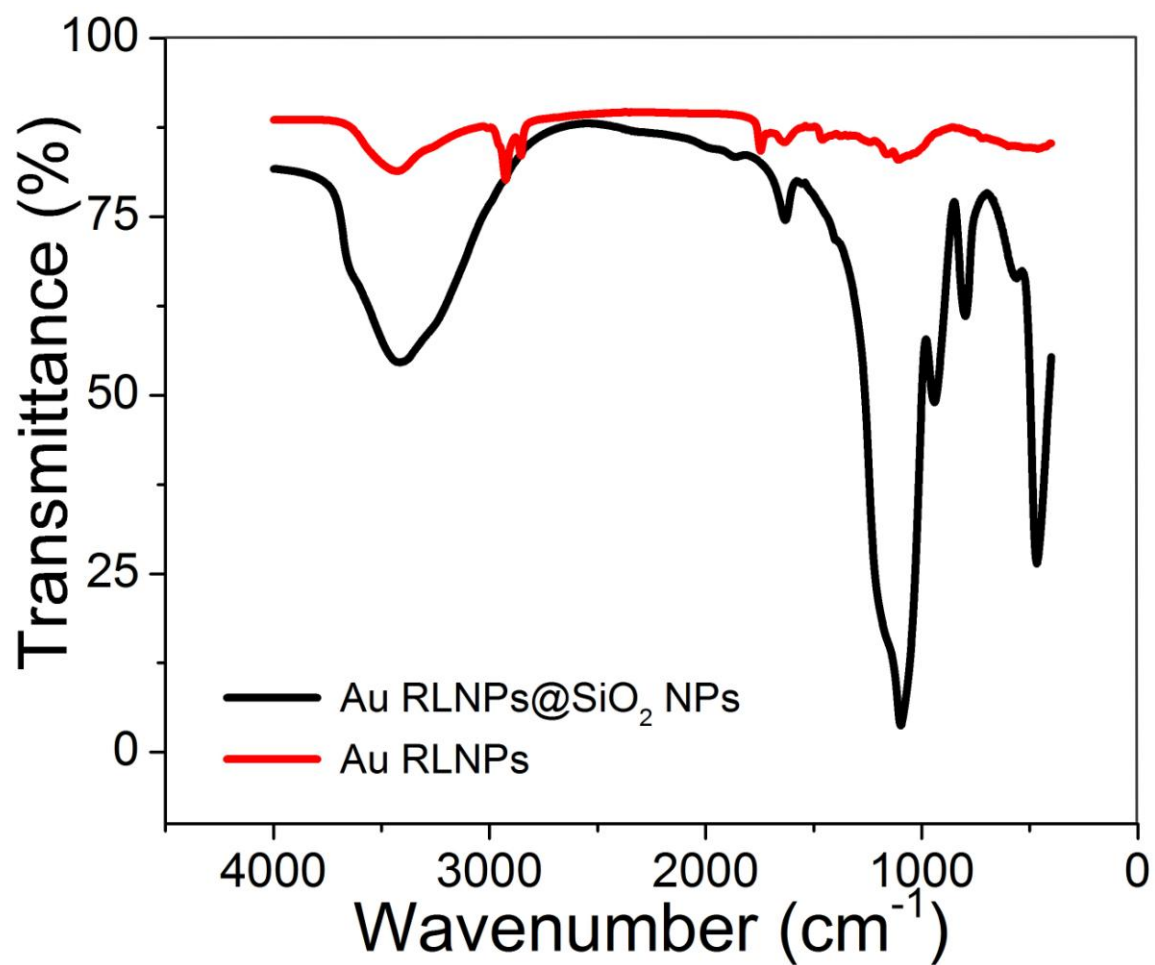

**Figure S3.** FT-IR spectra of (i) Au RLNPs and (ii) Au RLNPs@SiO<sub>2</sub> NPs in KBr pellets.

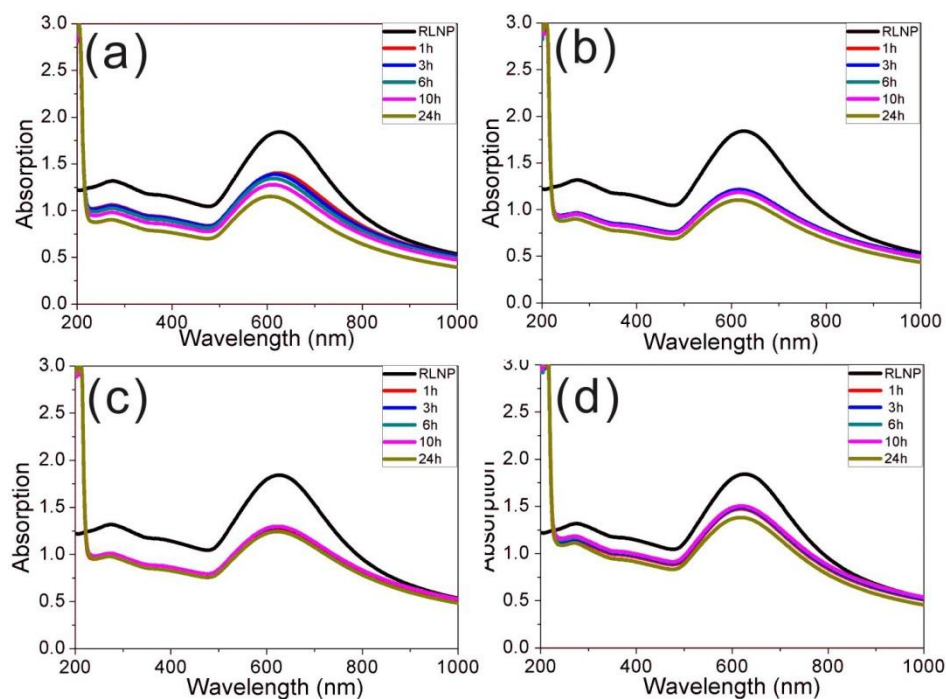

**Figure S4.** UV-Vis spectral changes of Au RLNPs before (black) and after the addition of (a) 200, (b) 100, (c) 50, and (d) 10 mM of CTAB (*aq*) (100  $\mu$ L) into the dispersion of as-synthesized Au RLNPs in nanopure water (1 mL) corresponding to each reaction time.

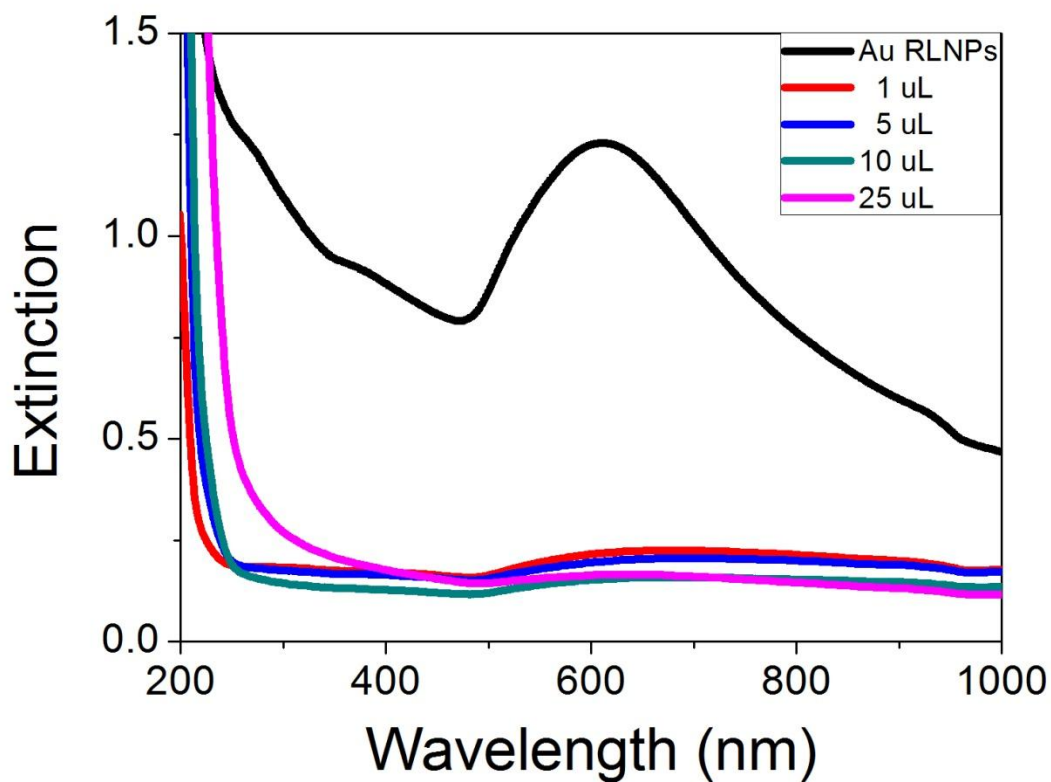

**Figure S5.** UV-Vis spectral changes of Au RLNPs before (black) and after the addition of 1, 5, 10, and 25  $\mu\text{L}$  of mercaptosilane (MPTS) (95 %) into the dispersion of as-synthesized Au RLNPs in ethanol (1 mL). (UV-Vis spectra were observed in water after 24 hours reactions.)

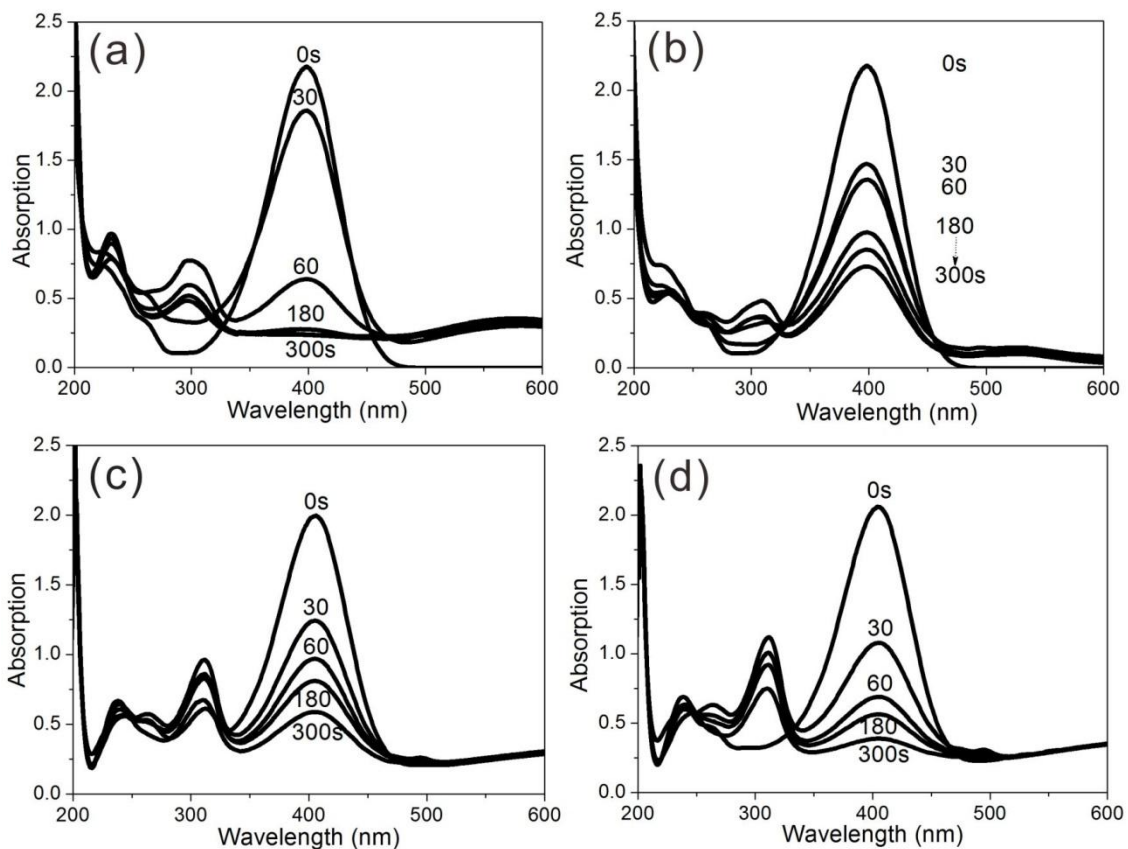

**Figure S6.** UV-Vis spectra showing the reduction reaction of 4-nitrophenol (4-NP) over (a) Au RLNPs; (b) HCl-treated Au RLNPs; (c) Au RLNPs@SiO<sub>2</sub>; (d) HCl-treated Au RLNPs@SiO<sub>2</sub>.

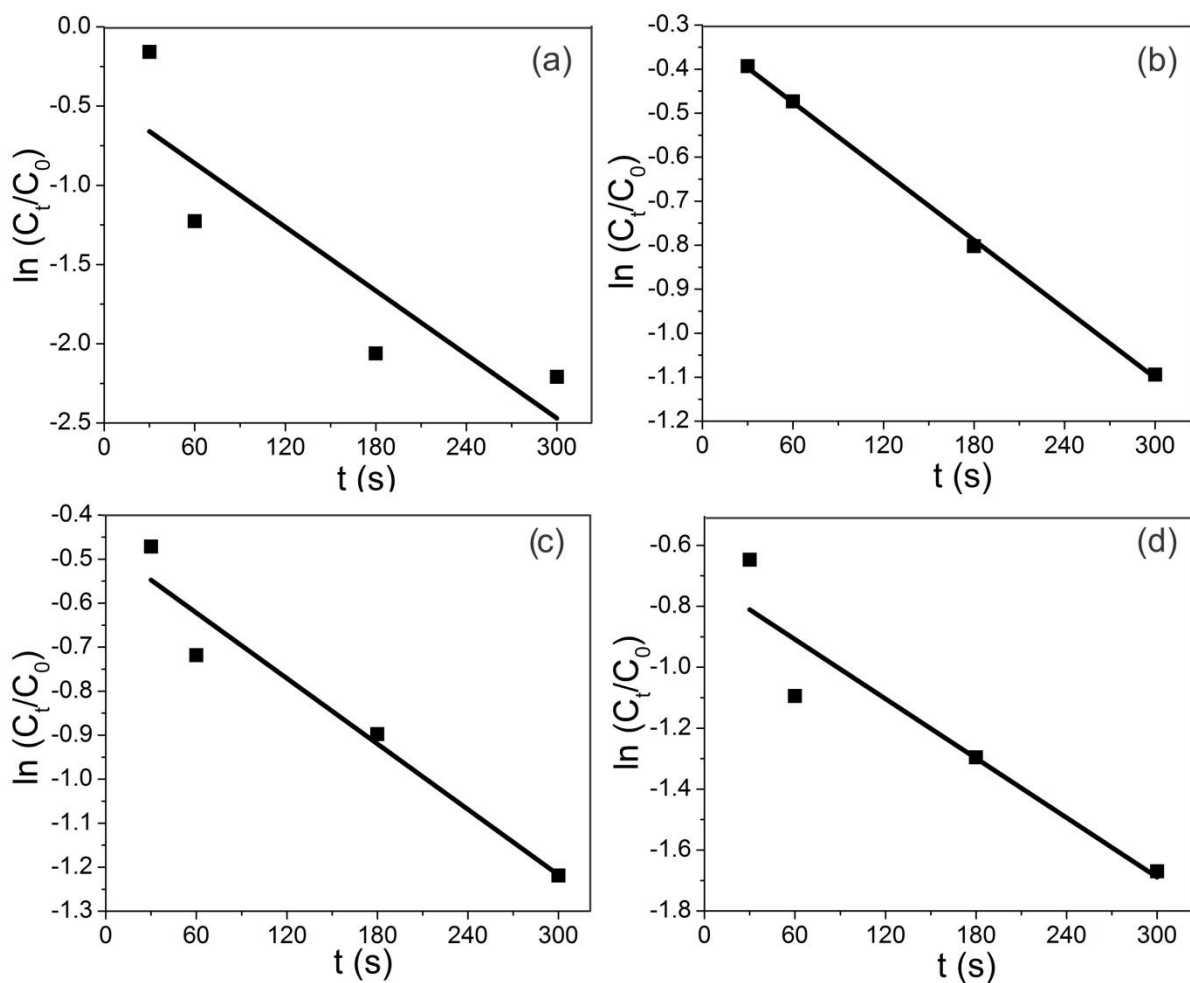

**Figure S7.** Plot of  $\ln(C_t/C_0)$  versus time for (a) Au RLNPs; (b) HCl-treated Au RLNPs; (c) Au RLNPs@SiO<sub>2</sub>; (d) HCl-treated Au RLNPs@SiO<sub>2</sub> NPs. The rate constants in different systems calculated based on the slope of the linear fit of  $-\ln(C_t/C_0)$  versus time are (a)  $6.7 \times 10^{-3}$ , (b)  $2.5 \times 10^{-3} \text{ s}^{-1}$ , (c)  $2.6 \times 10^{-3}$ , and (d)  $3.3 \times 10^{-3} \text{ s}^{-1}$



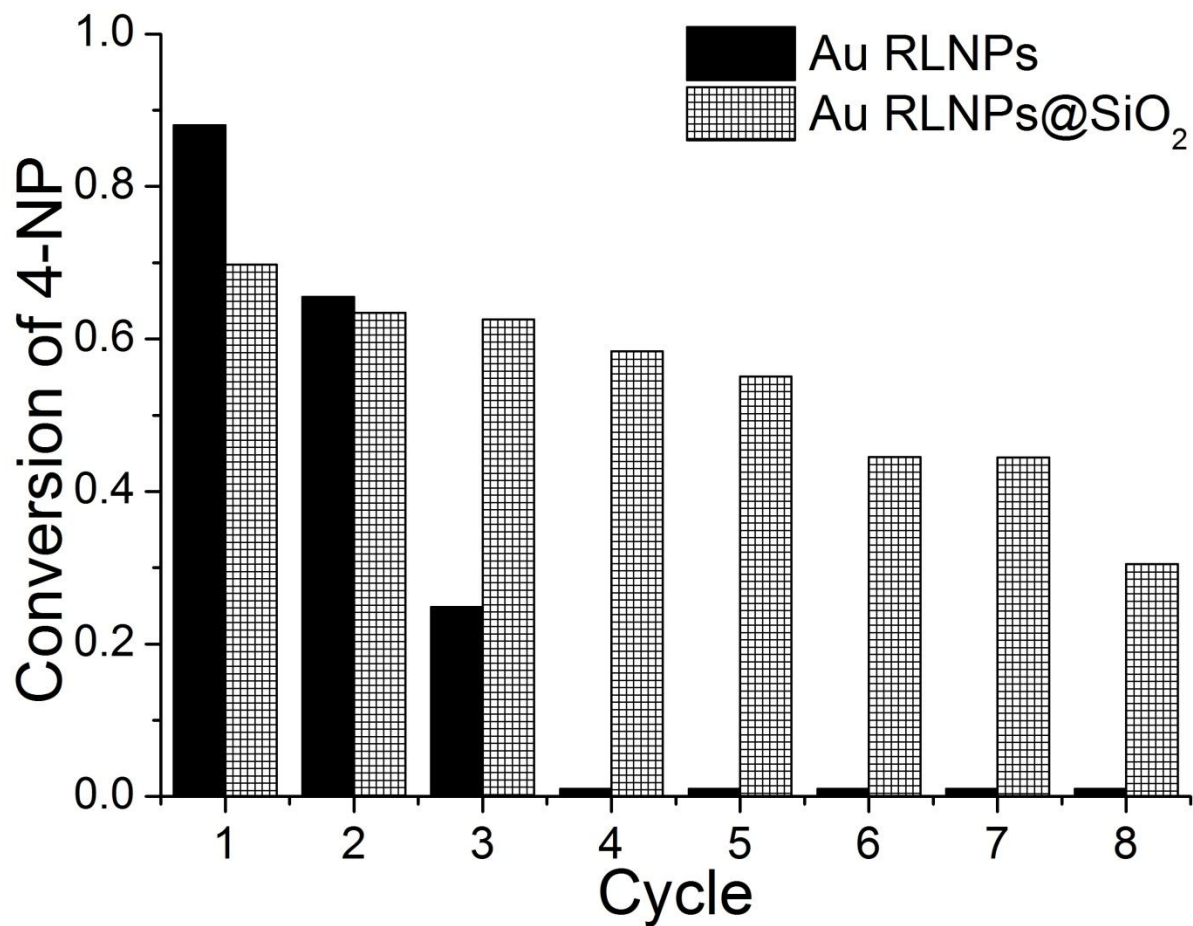

**Figure S8.** Histogram comparing the catalytic performance of Au RLNPs and Au RLNPs@SiO<sub>2</sub> based on the conversion of 4-NP. (Conversion of 4-NP =  $1 - C_t/C_0$ )
